# Supplementary material for: Increased TET1 Expression in Inflammatory Microenvironment of Hyperinsulinemia Enhances the Response of Endometrial Cancer to Estrogen by Epigenetic Modulation of GPER
Source: PubMed Central journal article supplement — J Cancer. 2017 Mar 12;8(5):894–902. doi: 10.7150/jca.17064 (PMC5381179; doi:10.7150/jca.17064), 2017-03-12
Supplement: jcav08p0894s1.pdf [file jcav08p0894s1.pdf]

Table S1. Primers

| Gene       | primer sequence                  | annealing temperature(°C) |
|------------|----------------------------------|---------------------------|
| GPER       | FORWARD: GGGGAAGAGGCCACCAACAT    | 59                        |
|            | REVERSE: CTCACTCTCTGGGTACCTGGGTT | 59                        |
| GAPDH      | FORWARD: AACGGATTTGGTCGTATTG     | 59                        |
|            | REVERSE: GGAAGATGGTGTATGGGATT    | 59                        |
| GPER       | FORWARD: GGTTTCGTGAGCTACCACCA    | 60                        |
| Promoter 1 | REVERSE: ACACGTCTACATTGGGCAGG    | 60                        |
| GPER       | FORWARD: CAGAGGGTCACGGCGAATTA    | 60                        |
| Promoter 2 | REVERSE: AGTTCATGCAGAGTGGGACG    | 60                        |

Figure S1

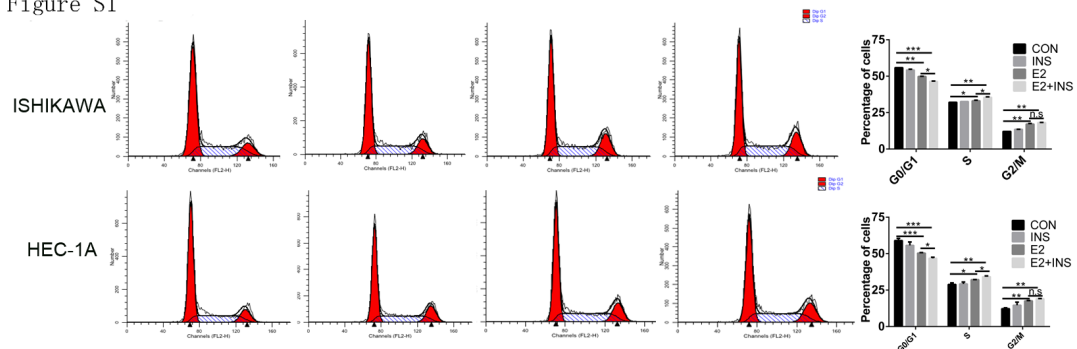

Figure legend

Cell cycle profiles of ISHIKAWA and HEC-1A cells treated by insulin (100nM) and/or E2 (10nM) for 48h. Insulin promoted estrogen-driven cell cycle progression by decreasing the level of G0/G1 phase and increasing the level of S phase significantly. Insulin and estrogen co-treatment increased the level of G2/M phase but not significantly when compared to E2 alone.
